# Supplementary material for: Phytoplankton Distribution in Mar Menor Coastal Lagoon (SE Spain) during 2017
Source: Preprints.org preprint supplement (doi:10.20944/preprints201912.0277.v2), 2020-07-20
Supplement: Supplementary file 1 [file supplementary]

## Sheet: TableS1
Table S1. Main table of density (cells/ml) of the phytoplankton in all the samples studied
			DATE OF SAMPLE	May 8, 2017				Jun 25, 2017			Sep 1. 2017		Oct 21, 2017			Oct 28, 2017			Dec 9, 2017
KINGDOM	CLASS	LIFE STYLE	TAXON SITE	A2	A3	A5	A6	A2	A3	A4	A1	A2	A4	A5	A6	A1	A2	A3	A2	A4	A5	A6
Chromist	Bacillariophyceae	Unicellular	Achnanthes sp. Bory, 1822	0	0	0	0	4.39246	0	0	0	0	0	0	0	0	0	0	0	0	0	0
Chromist	Bacillariophyceae	Unicellular	Achnanthidium minutissimum (Kützing) Czarnecki, 1994	0	0	0	5.68976	0	0	1.89674	0	10.4321	0	0	0	0	0	0	0	0	0	0
Chromist	Bacillariophyceae	Unicellular	Amphora veneta Kützing, 1844	0	0	0	0	0	0	1.89674	0	10.4321	0	0	0	3.12963	0	1.04321	0	0	0	0
Chromist	Bacillariophyceae	Unicellular	Aulacodiscus sp. C.G. Ehrenberg, 1844	0	0	0	0	0	0	0	0	0	0	0	0	0	0	0	0	0	0	0
Chromist	Bacillariophyceae	Unicellular	Aulacoseira sp. Thwaites, 1848	0	0	0	0	1.09812	0	0.948372	0	0	0	0	0	0	0	0	0	0	0	0
Chromist	Bacillariophyceae	Unicellular	Bacteriastrum delicatulum Cleve, 1897	0.403358	0	0	0	0	0	0	0	0	0	0	0	0	0	0	0	0	0	0
Chromist	Bacillariophyceae	Colonial	Chaetoceros muelleri Lemmermann, 1898	284.488	20.2622	22.759	182.072	0	9.38889	0	0	0	0	122.577	105.176	0	0	5.21605	0	0	108.957	122.34
Chromist	Bacillariophyceae	Colonial	Chaetoceros sp. C.G. Ehrenberg, 1844	0	0	0	0	0	0	0	194.89	0	0	0	9.78009	0	175.449	0	0	527.88	0	0
Chromist	Bacillariophyceae	Unicellular	Cocconeis sp. C.G. Ehrenberg, 1837	0	0	0	0	6.58869	0	0	2.37093	0	0	0	0	6.25926	0	4.17284	2.08642	0	0	0
Chromist	Bacillariophyceae	Unicellular	Coscinodiscus centralis Ehrenberg, 1844	1.31091	1.39615	0.450378	0.984397	0	0	0.948372	0	0	0	0	0	0	0	1.04321	0	0	0	0
Chromist	Bacillariophyceae	Unicellular	Cyclotella glomerata H.Bachmann, 1911	819.325	108.156	261.729	176.382	39.5322	37.5555	10.4321	37.9349	2232.47	119.969	91.2808	21.1902	198.21	101.95	84.5	35.4691	94.74	40.5693	16.4713
Chromist	Bacillariophyceae	Unicellular	Cyclotella meneghiniana Kützing, 1844	0	2.26289	0.225189	0.328132	2.19623	7.30247	3.79349	11.65	31.2963	15.6481	0	0	18.7778	21.3384	2.08642	60.5062	22.94	34.3903	27.012
Chromist	Bacillariophyceae	Unicellular	Cylindrotheca closterium (Ehrenberg) Reimann & J.C.Lewin, 1964	1.99	33.7566	0	0	4.39246	2.08642	0.948372	30.27	62.5926	179.084	23.6576	0.991476	179.432	30.9	303.574	2.08642	28.35	6.11539	5.10396
Chromist	Bacillariophyceae	Unicellular	Cymbella sp. C.A. Agardh, 1830	0	0	0	0	0	0	0	2.37093	0	0	0	0	0	0	0	0	0	0	0
Chromist	Bacillariophyceae	Unicellular	Diploneis interrupta (Kützing) Cleve, 1894	0	0.176469	0	0	0	0	0	0	0	0	0	0	0	0	0	0	0	0	0
Chromist	Bacillariophyceae	Unicellular	Fragilariopsis sp. F. Hustedt in A. Schmidt et al., 1913	0	0	0	0	0	0	0	2.37093	0	0	0	0	0	0	0	0	0	0	0
Chromist	Bacillariophyceae	Unicellular	Halamphora veneta (Kützing) Levkov, 2009	0	2.08642	0	0	0	0	0	0	0	0	0	0	0	0	0	0	0	0	0
Chromist	Bacillariophyceae	Unicellular	Hantzschia amphioxys (Ehrenberg) Grunow in Cleve & Grunow, 1880	0	2.08642	0	0	0	3.12963	0	0	31.2963	0	0	0	0	0	0	0	0	0	0
Chromist	Bacillariophyceae	Unicellular	Navicula sp. 1 J.B.M. Bory de Saint-Vincent, 1822	2.01679	0	0	0	0	0	0	26.0802	0	0	0	0	0	2.37093	0	0	0	0	0
Chromist	Bacillariophyceae	Unicellular	Navicula sp. 2 J.B.M. Bory de Saint-Vincent, 1822	0	0	0	0	0	0	0	16.77	0	0	0	0	0	0	0	0	0	0	0
Chromist	Bacillariophyceae	Unicellular	Navicula sp. 3 J.B.M. Bory de Saint-Vincent, 1822	0	0	0	0	0	0	0	130.72	0	0	0	0	0	0	0	0	0	0	0
Chromist	Bacillariophyceae	Unicellular	Nitzschia longissima (Brébisson) Ralfs, 1861	234.23	10.0948	22.759	47.2356	5.49058	0	0	104.321	20.8642	22.6029	286.883	57.1406	37.5555	403.058	17.7346	8.34568	83.97	14.8685	11.7184
Chromist	Bacillariophyceae	Unicellular	Nitzschia panduriformis W.Gregory, 1857	0	2.43936	0	0	0	0	0	0	0	0	0	0	0	0	0	0	0	0	0
Chromist	Bacillariophyceae	Unicellular	Pinnularia sp. 1 C.G. Ehrenberg, 1843	0.705876	0	0	0	7.68681	0	0	4.56	20.8642	5.21605	0	0	3.12963	0	2.08642	0	0	0	0
Chromist	Bacillariophyceae	Unicellular	Pinnularia sp. 2 C.G. Ehrenberg, 1843	0	0	0	0	0	0	0	7.11279	0	0	0	0	0	0	0	0	0	0	0
Chromist	Bacillariophyceae	Unicellular	Pseudo-nitzschia delicatissima (Cleve) Heiden, 1928	0	0	0	0	0	0	0	2.37093	0	0	0	0	0	0	0	0	0	0	0
Chromist	Bacillariophyceae	Unicellular	Fragilaria sp. H.C. Lyngbye, 1819	0	0	0	0	0	0	0	5.54737	0	0	0	0	0	0	0	0	0	0	0
Chromist	Bacillariophyceae	Unicellular	Other small pennate diatoms	0	5.21605	0	0	43.9246	13.5617	15.174	15.8822	83.4568	0	0	0	2.08642	0	0	0	0	0	0
Chromist	Chrysophyceae	Unicellular	Calycomonas sp. Lohmann, 1908	0	0	0	5.68976	133.97	31.2963	40.78	0	3233.95	83.4568	0	0	578.981	0	992.092	1372.86	0	0	0
Chromist	Chrysophyceae	Unicellular	Nanoplanktonic Chrysophyceae	5723.89	2332.62	0	0	183.385	1098.5	103.373	68.2759	2649.75	0	61.8434	84.7608	0	0	0	0	0	162.277	32.2447
Chromist	Chrysophyceae	Unicellular	Dinobryon borgei Lemmermann, 1904	11.3795	2.08642	11.3795	0	0	0	0	0	0	0	0	0	0	0	0	0	0	0	0
Chromist	Chrysophyceae	Unicellular	Dinobryon sp. Ehrenberg, 1834	1.78777	0	0	0	0	0	0	0	0	0	0	0	0	0	0	0	0	0	0
Chromist	Chrysophyceae	Unicellular	Mallomonas sp. Perty, 1852	11.3795	0	0.225189	5.68976	0	0	0	0	0	0	0	0	0	0	0	0	0	0	0
Chromist	Chrysophyceae	Unicellular	Ochromonas sp. Vysotskii [Wysotzki, Wyssotzki], 1887	0	0	0	5.68976	0	0	0	0	0	0	0	0	0	0	0	0	0	0	0
Chromist	Chrysophyceae	Unicellular	Ollicola vangoorii (W.Conrad) Vørs, 1992	22.759	0	0	0	272.333	92.8457	82.5084	0	0	8.69341	0	0	26.0802	0	1.04321	39.642	0	0	0
Chromist	Chrysophyceae	Unicellular	Chrysophyceae cysts	0	0	0	0	0	0	0	0	0	0	208.642	32.6003	0	0	0	0	0	707.064	407.8
Chromist	Cryptophyceae	Unicellular	Cryptomonas marssonii Skuja, 1948	56.8976	3.3061	0.450378	5.68976	2.19623	0	0	0	0	0	12.4801	25.1725	57.3765	0	46.9444	8.34568	0	0	0
Chromist	Cryptophyceae	Unicellular	Leucocryptos marina (Braarud) Butcher, 1967	0	0	0	0	0	0	0	16.36	0	0	0	0	0	0	0	0	0	0	0
Chromist	Cryptophyceae	Unicellular	Leucocryptos sp. Butcher, 1967	0	0	0	0	4.39246	11.4753	2.84512	2.37093	0	8.69341	0	0	0	0	7.30247	0	0	0	0
Chromist	Cryptophyceae	Unicellular	Plagioselmis lacustris (Pascher & Ruttner) Javornicky, 2001	56.8976	3.70585	136.554	108.105	0	0	0	0	0	126.924	469.444	700.906	155.438	722.222	119.969	41.7284	438.148	158.8	73.973
Chromist	Cryptophyceae	Unicellular	Plagioselmis sp. Butcher ex G.Novarino, I.A.N.Lucas & S.Morrall, 1994	0	0	0	0	0	0	0	199.23	0	0	0	0	0	0	0	0	784.528	0	0
Chromist	Cryptophyceae	Unicellular	Rhodomonas salina (Wislouch) D.R.A.Hill & R.Wetherbee, 1989	1.00839	0	0	0	0	0	0	4.54	0	0	148.657	242.468	18.7778	71.1279	52.1605	47.9876	12.25	51.9144	14.6836
Chromist	Cryptophyceae	Unicellular	Nanoplanktonic Cryptophyceae unicellular	0	0	0	0	0	0	0	65533.8	0	0	0	0	0	19393.8	0	0	57863.6	0	0
Chromist	Cryptophyceae	Colonial	Nanoplanktonic Cryptophyceae colonial	0	0	0	0	0	0	0	0	0	0	0	0	0	412.937	0	0	0	0	0
Chromist	Dinophyceae	Unicellular	Akashiwo sanguinea (K.Hirasaka) G.Hansen & Ø.Moestrup, 2000	1.00839	3.39433	0	0.328132	1.09812	3.12963	3.79349	0	0	3.47737	9.09016	6.32943	4.17284	1.48981	5.21605	0	0	0	0
Chromist	Dinophyceae	Unicellular	Alexandrium sp. Halim, 1960	0	0	0.900756	11.3795	0	0	0	0	0	0	0	0	0	0	0	0	0	0	0
Chromist	Dinophyceae	Unicellular	Amphidinium sp. Claperède & Lachmann, 1859	0	0	0	0	0	0	0	0	0	0	0	0	0	0	21.9074	8.34568	0	0	0
Chromist	Dinophyceae	Unicellular	Blepharocysta splendor maris (Ehrenberg) Ehrenberg	0	0	2.0267	11.3795	0	0	0	0	0	0	0	0	0	0	0	0	0	0	0
Chromist	Dinophyceae	Unicellular	Ceratium fusus (Ehrenberg) Dujardin, 1841	0	0	0	0	0	0	0	0.529407	0	0	0	0	0	0	0	0	0	0	0
Chromist	Dinophyceae	Unicellular	Dinophysis norvegica Claparède & Lachmann, 1859	0	0	0	0	1.09812	0	0	0	0	0	0	0	0	0	0	0	0	0	0
Chromist	Dinophyceae	Unicellular	Dinophysis punctata Jörgensen, 1923	0	3.3061	0	0	0	0	0	0	0	0	0	0	0	0	0	0	0	0	0
Chromist	Dinophyceae	Unicellular	Dinophysis sacculus Stein	0	0	0.112594	0	0	0	0	0	0	0	0	0	0	0	0	0	0	0	0
Chromist	Dinophyceae	Unicellular	Diplopsalis lenticula Bergh	0	0.176469	5.68976	0	0	0	0	0	0	0	0	0	0	0	0	0	0	0	0
Chromist	Dinophyceae	Unicellular	Glenodinium rotundum (Lebour) J.Schiller 1935	0	0	0	0	0	0	0	0	0	0	0	0	0	0	0	0	0	0	0.948372
Chromist	Dinophyceae	Unicellular	Gonyaulax spinifera (Claparède & Lachmann) Diesing, 1866	11.3795	1.21968	1.57632	0.984397	0	0	0	0	0	1.73868	0	0	0	0	0	0	0	0	0
Chromist	Dinophyceae	Unicellular	Gymnodinium amphora Kofoid & Swezy, 1921	0	0	0	0	0	3.12963	4.74186	0	0	1.73868	0	0	0	0	10.4321	8.34568	0	0	0
Chromist	Dinophyceae	Unicellular	Gymnodinium sp. pl. F.Stein, 1878	0	34.151	0	0.328132	26.3548	10.4321	10.4321	566.898	0	126.924	437.476	160.539	50.0741	178.648	240.981	114.753	294.9	307.157	37.7016
Chromist	Dinophyceae	Unicellular	Gyrodinium sp. Kofoid & Swezy, 1921	0	0	0.450378	0	0	0	0	0	0	5.21605	24.5818	8.9736	14.6049	4.61	0	2.08642	0	0	0.948372
Chromist	Dinophyceae	Unicellular	Gyrodinium fusiforme Kofoid & Swezy, 1921	0	1.66085	0.675567	3.28132	0	0	0	14.2256	10.4321	55.6378	2.88672	9.75137	1.04321	4.33	2.08642	2.08642	63.12	0	0
Chromist	Dinophyceae	Unicellular	Gyrodinium spirale (Bergh) Kofoid & Swezy, 1921	0	0	0	0	0	0	0	0.529407	0	0	13.3162	13.501	5.21605	3.55	21.9074	0	0	0	0.893884
Chromist	Dinophyceae	Unicellular	Gyrodinium sp. nanoplanktonic Kofoid & Swezy, 1921	0	0	0	0	0	0	0	0	0	0	0	13.1739	0	0	0	0	0	0	0
Chromist	Dinophyceae	Unicellular	Heterodinium sp. Kofoid, 1906	0	0	0	0	0	0	0	0	0	0	0	0	0	0	0	0	0	0	0
Chromist	Dinophyceae	Unicellular	Histioneis subcarinata Rampi, 1947	0	0	0	0	0	0	0	2.37093	0	0	0	0	0	0	0	0	0	0	0
Chromist	Dinophyceae	Unicellular	Katodinium fungiforme (Anissimova) Fott, 1957	0	2.26289	119.485	187.762	0	1.04321	1.89674	0	0	6.95473	0	0	17.7346	0	36.5123	0	0	0	0
Chromist	Dinophyceae	Unicellular	Katodinium glaucum (Lebour) Loeblich III, 1965	0	2.8235	0	0	0	0	0	0	0	0	0	0	0	0	7.30247	12.5185	0	0	0
Chromist	Dinophyceae	Unicellular	Katodinium sp. Fott, 1957	0	0	0	0	0	0	0	0	0	0	0	0	0	0	0	0	0	0	0
Chromist	Dinophyceae	Unicellular	Parvodinium umbonatum (Stein) S.Carty, 2008	0	0	0	0	0	0	0	0	0	0	0	0	0	0	0	0	0	0	0
Chromist	Dinophyceae	Unicellular	Peridinium conicum (Gran) Ostenfeld & Schmidt, 1902	0	0.882345	0	0	0	0	0	0	0	0	0	0	0	0	0	0	0	0	0
Chromist	Dinophyceae	Unicellular	Peridinium sp. Ehrenberg, 1830	0	13.2556	0	0	4.39246	0	0	2.37093	0	52.1605	0	2.32804	10.4321	6.98	11.4753	6.25926	0	1.15912	0.893884
Chromist	Dinophyceae	Unicellular	Polykrikos sp. Bütschli, 1873	0	0	0	0	0	0	0	10.4321	20.8642	0	0	0.352879	0	0	0	0	0	0	0
Chromist	Dinophyceae	Unicellular	Polykrikos schwartzii Bütschli, 1873	0	3.23347	0.225189	0.328132	0	1.04321	0	0	0	0	0	0	0	0	0	0	0	0	0
Chromist	Dinophyceae	Unicellular	Podolampas bipes Stein	0	0	0.112594	0	0	0	0	0	0	0	0	0	0	0	0	0	0	0	0
Chromist	Dinophyceae	Unicellular	Podolampas palmipes Stein, 1883	0	0	0	5.68976	0	0	0	0	0	0	0	0	0	0	0	0	0	0	0
Chromist	Dinophyceae	Unicellular	Podolampas sp. F.Stein, 1883	0	0	0.225189	0	0	0	0	0	0	0	0	0	0	0	0	0	0	0	0
Chromist	Dinophyceae	Unicellular	Prorocentrum balticum (Lohmann) Loeblich, 1970	0	0.882345	0	0	0	0	0.948372	0	0	0	0	0.940931	4.17284	0	3.12963	14.6049	0	1.27698	0
Chromist	Dinophyceae	Unicellular	Prorocentrum compressum (J.W.Bailey) Abé ex J.D.Dodge, 1975	0	0	0	0	0	0	0	16.39	0	0	0	0	0	10.53	0	0	2.11763	0	0
Chromist	Dinophyceae	Unicellular	Prorocentrum gracile Schütt, 1895	0	2.08642	0	0	2.19623	0	2.84512	0.529407	0	0	1.32352	1.05881	0	2.07	0	0	0	0	0
Chromist	Dinophyceae	Unicellular	Prorocentrum micans Ehrenberg, 1834	0	45.4762	23.87	24.6099	0	0	0	10.4321	0	19.1255	13.6849	4.7778	16.6914	11.39	19.821	0	1.05881	0.705876	0
Chromist	Dinophyceae	Unicellular	Prorocentrum minimum (Pavillard, 1916) J.Schiller, 1933	0	0.176469	0	0	31.8453	28.1667	40.78	0	0	0	0	0	0	0	0	0	0	0	0
Chromist	Dinophyceae	Unicellular	Prorocentrum triestinum J.Schiller, 1918	0	0.352938	0	0	0	0	0	0	0	0	0	0	0	0	0	0	0	0	0
Chromist	Dinophyceae	Unicellular	Prorocentrum nanum J.Schiller, 1918	0	0	0	0	0	0	0	2.37093	0	0	0	0	0	0	0	0	0	0	0
Chromist	Dinophyceae	Unicellular	Protoperidinium applanatum (Mangin) Balech, 1974	0	0	0	0	0	0	0	0	0	0	0	0	0	0	0	0	0	0	0
Chromist	Dinophyceae	Unicellular	Protoperidinium claudicans (Paulsen, 1907) Balech, 1974	0	0	0	0	0	0	0	0	0	0	0	0	0	0	0	0	0	0	0
Chromist	Dinophyceae	Unicellular	Protoperidinium divergens (Ehrenberg) Balech, 1974	0	0	0	0	0	0	0	0	0	0	0	0	0	0	0	0	0	0.117646	0
Chromist	Dinophyceae	Unicellular	Protoperidinium steinii (Jørgensen, 1899) Balech, 1974	0	0	0	0	0	0	0	0	0	0	0	0	0	9	0	0	0	0	0
Chromist	Dinophyceae	Unicellular	Protoperidinium sp. Bergh, 1882	0	0	0	0	1.09812	0	0.948372	75.8698	0	1.73868	0	0	0	0	0	2.08642	0	0	0
Chromist	Dinophyceae	Unicellular	Protopsis ochrea (Wright) Kofoid & Swezy, 1921	0	0	0	0	0	0	0	0	0	0	0	0	0	0	2.08642	0	0	0	0
Chromist	Dinophyceae	Unicellular	Spirodinium fusus Meunier, 1910	0	0.705876	0	0	0	0	0	0	0	0	0	0	0	0	0	0	0	0	0
Chromist	Dinophyceae	Unicellular	Tripos furca (Ehrenberg) F.Gómez, 2013	6.32	1.39615	0.450378	0.984397	0	0	0	5.86	10.4321	1.73868	0.264703	0.470465	0	0	0	2.08642	1.51259	1.63837	0
Chromist	Cyanophyceae	Filamentous	Arthrospira sp. Sitzenberger ex Gomont, 1892	0	0	0	0	0	0	0	0	0	0	0	0	1.04321	0	0	0	0	0	0
Chromist	Cyanophyceae	Filamentous	Small cyanobacteria	0	0	0	0	0	0	0	0	0	0	0	1.52071	0	0	0	0	0	0	0
Chromist	Cyanophyceae	Filamentous	Small filamentous cyanobacteria	0	0	0	0	0	0	0	4.29	0	0	0	7.33779	0	0	1.04321	0	0	0	0
Chromist	Cyanophyceae	Colonial	Chroococcus dispersus (Keissler) Lemmermann	0	0	0	11.3795	0	0	0	0	0	0	0	0	0	0	0	0	0	0	0
Chromist	Cyanophyceae	Filamentous	Spirulina subsalsa Oersted ex Gomont, 1892	0	0	0	0	0	0	1.89674	14.95	0	0	0	0	0	0	0	0	0	0	0
Chromist	Cyanophyceae	Unicellular/Colonial	Synechococcus C.Nägeli, 1849	0	5216.05	0	0	2086.42	2086.42	2086.42	0	7302.47	3129.63	0	0	2086.42	0	0	1564.81	0	0	0
Chromist	Diphylleida	Unicellular	Collodictyon sp. H.J.Carter, 1865	34.1385	0	0	0	0	0	0	0	0	0	0	0	0	0	0	0	0	0	0
Plantae	Chlorophyceae	Unicellular	Cymbomonas sp. J.Schiller, 1913	0	0	17.0693	73.9668	0	0	1.89674	0	0	0	0	0	0	0	0	0	0	0	0
Plantae	Chlorophyceae	Unicellular	Pediastrum sp. Meyen, 1829	0	0	0	0	0	0	0	0	0	0	0	0	0	0	35.4691	0	0	0	0
Plantae	Chlorophyceae	Unicellular	Phaeocystis sp. Lahergeim, 1893	0	0	165.003	204.831	0	0	0	0	0	0	0	0	0	0	0	0	0	0	0
Plantae	Chlorophyceae	Unicellular	Tetraselmis sp. F.Stein, 1878	0	0	5.68976	17.0693	0	0	0	0	0	0	0	0	0	0	0	0	0	0	0
Plantae	Chlorophyceae	Unicellular	Nanoplanktonic Chlorophyceae	0	1068.25	1490.72	1308.64	1045.41	628.012	586.094	0	4903.08	3621.68	0	0	4017.4	0	6231.09	6.25926	0	0	0
Plantae	Conjugatophyceae (Zygnematophyceae)	Unicellular	Euastrum sp. Ehrenberg ex Ralfs, 1848	0.403358	0	0	0	0	0	0	0.53	0	0	0	0	0	0	0	0	0	0.941168	0
Plantae	Pedinophyceae	Unicellular	Staurastrum paradoxum Meyen ex Ralfs, 1848	341.385	0	244.66	244.66	0	0	0	0	0	0	0	0	0	0	0	0	0	0	0
Plantae	Conjugatophyceae (Zygnematophyceae)	Colonial	Scourfieldia complanata G.S.West, 1912	0	0	0	0	0	0	0	0	0	0	0	0	0	0	0	0	0	0	0
Bacteria		Unicellular	Bacterioplankton	0	0	0	0	0	0	13.2772	0	0	0	10934.7	9562.75	0	0	0	0	0	34676.3	40826
Bacteria	Flavobacteria	Filamentous	Flavobacterium sp. Bergey, 1923	0	0	0	0	0	0	0	0	0	0	0	0	0	0	0	4494.15	0	0	0
Protozoa	Euglenophyceae	Unicellular	Euglena sp. Ehrenberg, 1830	0	2.08642	0	0	0	4.17284	0	0	0	0	0	0	0	0	0	0	0	0	0
Protozoa	Euglenophyceae	Unicellular	Euglena viridis Ehrenberg, 1830	0	0	0.225189	0	0	0	2.84512	0	0	0	0	0	0	0	0	0	0	0	0
Protozoa	Thecofilosea	Unicellular	Hermesinum adriaticum O.Zacharias, 1906	0	3.39433	0	0	7.68681	0	0	186.31	31.2963	0	0	0	7.30247	0	2.08642	0	0	0	0
			TOTAL	7625.11	8936.87	2535.7	2651.16	3919.17	4072.69	3024.36	67334.7	20666	7598.04	12862.8	11074	7521.54	21567.7	8293.52	7857.45	60219.1	36274.2	41578.7
